# Supplementary material for: The Role of Coupled Positive Feedback in the Expression of the SPI1 Type Three Secretion System in Salmonella
Source: PubMed Central journal article supplement (PMC2912647; doi:10.1371/journal.ppat.1001025), 2010-07-29
Supplement: ppat.1001025.s002.pdf [file ppat.1001025.s002.pdf]

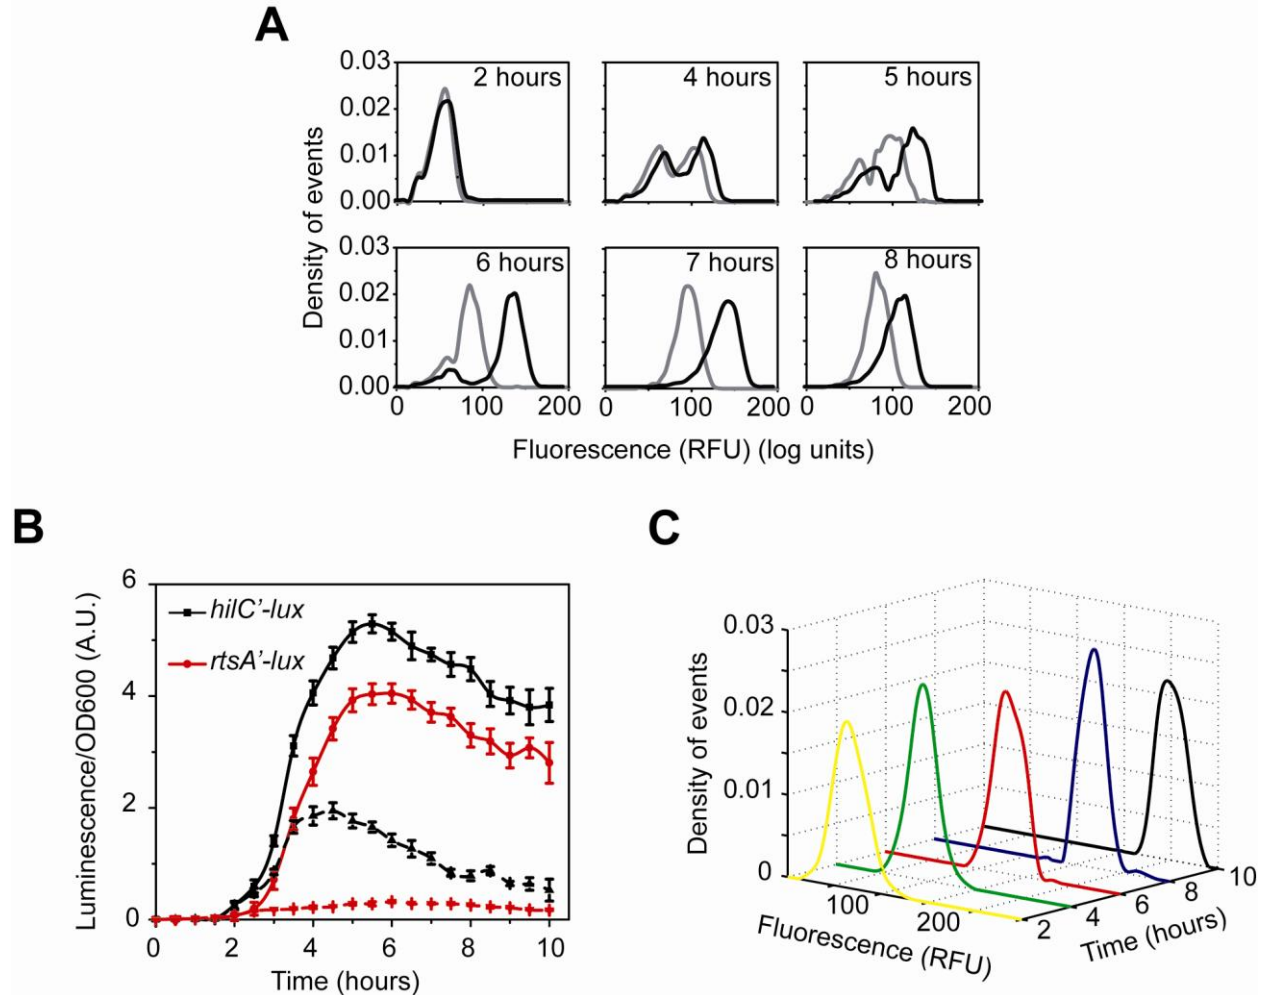

**Figure S2. Activation of the SPI1 gene circuit.**

(A). Comparison of time-course dynamics of  $P_{hilD}$  (pSS072) promoter activities in wild type (black) and a  $\Delta SPI1 \Delta rtsA$  mutant (CR349, grey) as determined using green fluorescent protein (GFP) transcriptional fusions and flow cytometry. (B) Comparison of  $P_{hilC}$  (pSS075, black) and  $P_{rtsA}$  (pSS076, red) promoter activities in wild type (solid lines) and a  $\Delta hilD$  mutant (JS253, dashed lines). Note that the  $P_{rtsA}$  promoter is off in the absence of HilD. (C) Dynamics of  $P_{hilC}$  (pSS073) promoter activities in a  $\Delta hilD$  mutant (JS253) as determined using green fluorescent protein (GFP) transcriptional fusions and flow cytometry. Note that, in the absence of HilD, the activation of the  $P_{hilC}$  promoter is no longer switch-like but instead continuous. Experiments were performed as described in Figure 1.
