# Supplementary material for: The Role of Coupled Positive Feedback in the Expression of the SPI1 Type Three Secretion System in Salmonella
Source: PubMed Central journal article supplement (PMC2912647; doi:10.1371/journal.ppat.1001025), 2010-07-29
Supplement: ppat.1001025.s003.pdf [file ppat.1001025.s003.pdf]

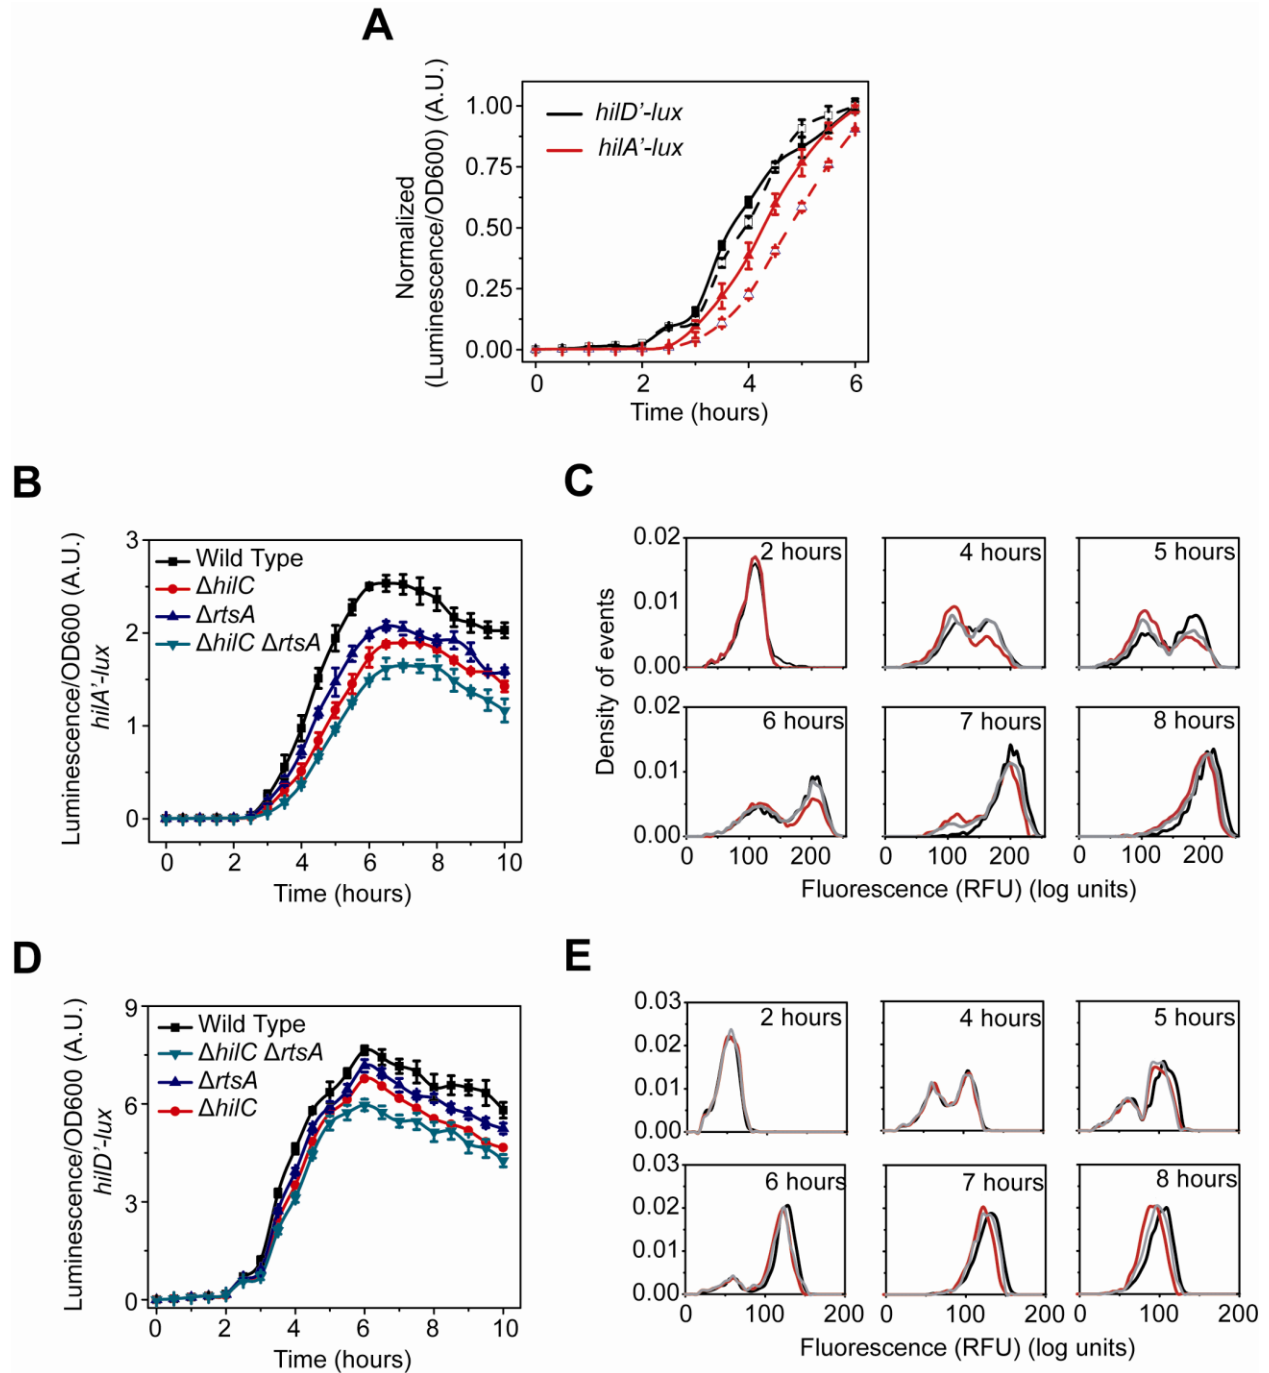

**Figure S3. HilC and RtsA amplify SPI1 gene expression in an additive manner.**

(A) Normalized  $P_{hilD}$  and  $P_{hilA}$  promoter activity in wild type (solid) and  $\Delta$ *hilC*  $\Delta$ *rtsA* (dashed) mutant. The data from Figure 3A were normalized with respect to their maximal value. (B) Comparison of time-course dynamics of  $P_{hilA}$  (pSS077) promoter activities in wild type and  $\Delta$ *rtsA* (JS248),  $\Delta$ *hilC* (JS252),  $\Delta$ *hilC*  $\Delta$ *rtsA* (CR350), and  $\Delta$ *hilD* (CR253) mutants as determined using luciferase transcriptional reporters. (C) Comparison of  $P_{hilA}$  (pSS055) promoter activities in wild type (black) and  $\Delta$ *hilC* (JS252, red) and  $\Delta$ *rtsA* (JS248, grey) mutants as determined using green fluorescent protein

(GFP) transcriptional fusions and flow cytometry. (D) Comparison of time-course dynamics of  $P_{hilD}$  (pSS074) promoter activities in wild type and  $\Delta rtsA$  (JS248),  $\Delta hilC$  (JS252),  $\Delta hilC \Delta rtsA$  (CR350), and  $\Delta hilD$  (CR253) mutants as determined using luciferase transcriptional reporters. (E) Comparison of  $P_{hilD}$  (pSS072) promoter activities in wild type (black) and  $\Delta hilC$  (JS252, red) and  $\Delta rtsA$  (JS248, grey) mutants as determined using green fluorescent protein (GFP) transcriptional fusions and flow cytometry. Experiments were performed as described in Figure 1.
