# Supplementary material for: The Role of Coupled Positive Feedback in the Expression of the SPI1 Type Three Secretion System in Salmonella
Source: PubMed Central journal article supplement (PMC2912647; doi:10.1371/journal.ppat.1001025), 2010-07-29
Supplement: ppat.1001025.s004.pdf [file ppat.1001025.s004.pdf]

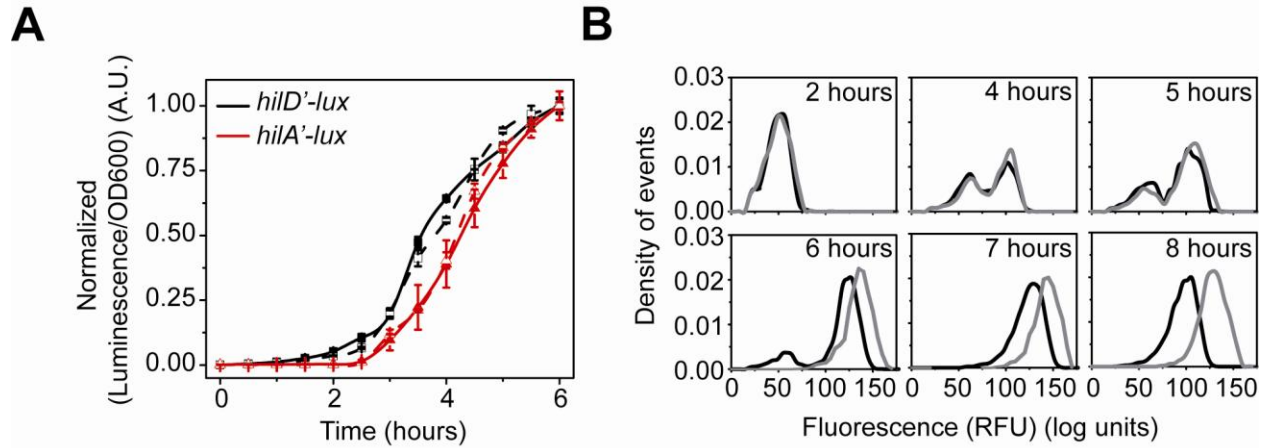

**Figure S4. HiLE negatively regulates HiLD expression.**

(A) Normalized  $P_{hilD}$  and  $P_{hilA}$  promoter activities in wild type (solid) and  $\Delta hilE$  (dashed) mutant. The data from Figure 4A was normalized to one for each strain. (B) Comparison of  $P_{hilD}$  (pSS072) promoter activities in wild type (black) and  $\Delta hilE$  (CR361, gray) mutant as determined using green fluorescent protein (GFP) transcriptional fusions and flow cytometry. Experiments were performed as described in Figure 1.
