# Supplementary material for: The Role of Coupled Positive Feedback in the Expression of the SPI1 Type Three Secretion System in Salmonella
Source: PubMed Central journal article supplement (PMC2912647; doi:10.1371/journal.ppat.1001025), 2010-07-29
Supplement: ppat.1001025.s006.pdf [file ppat.1001025.s006.pdf]

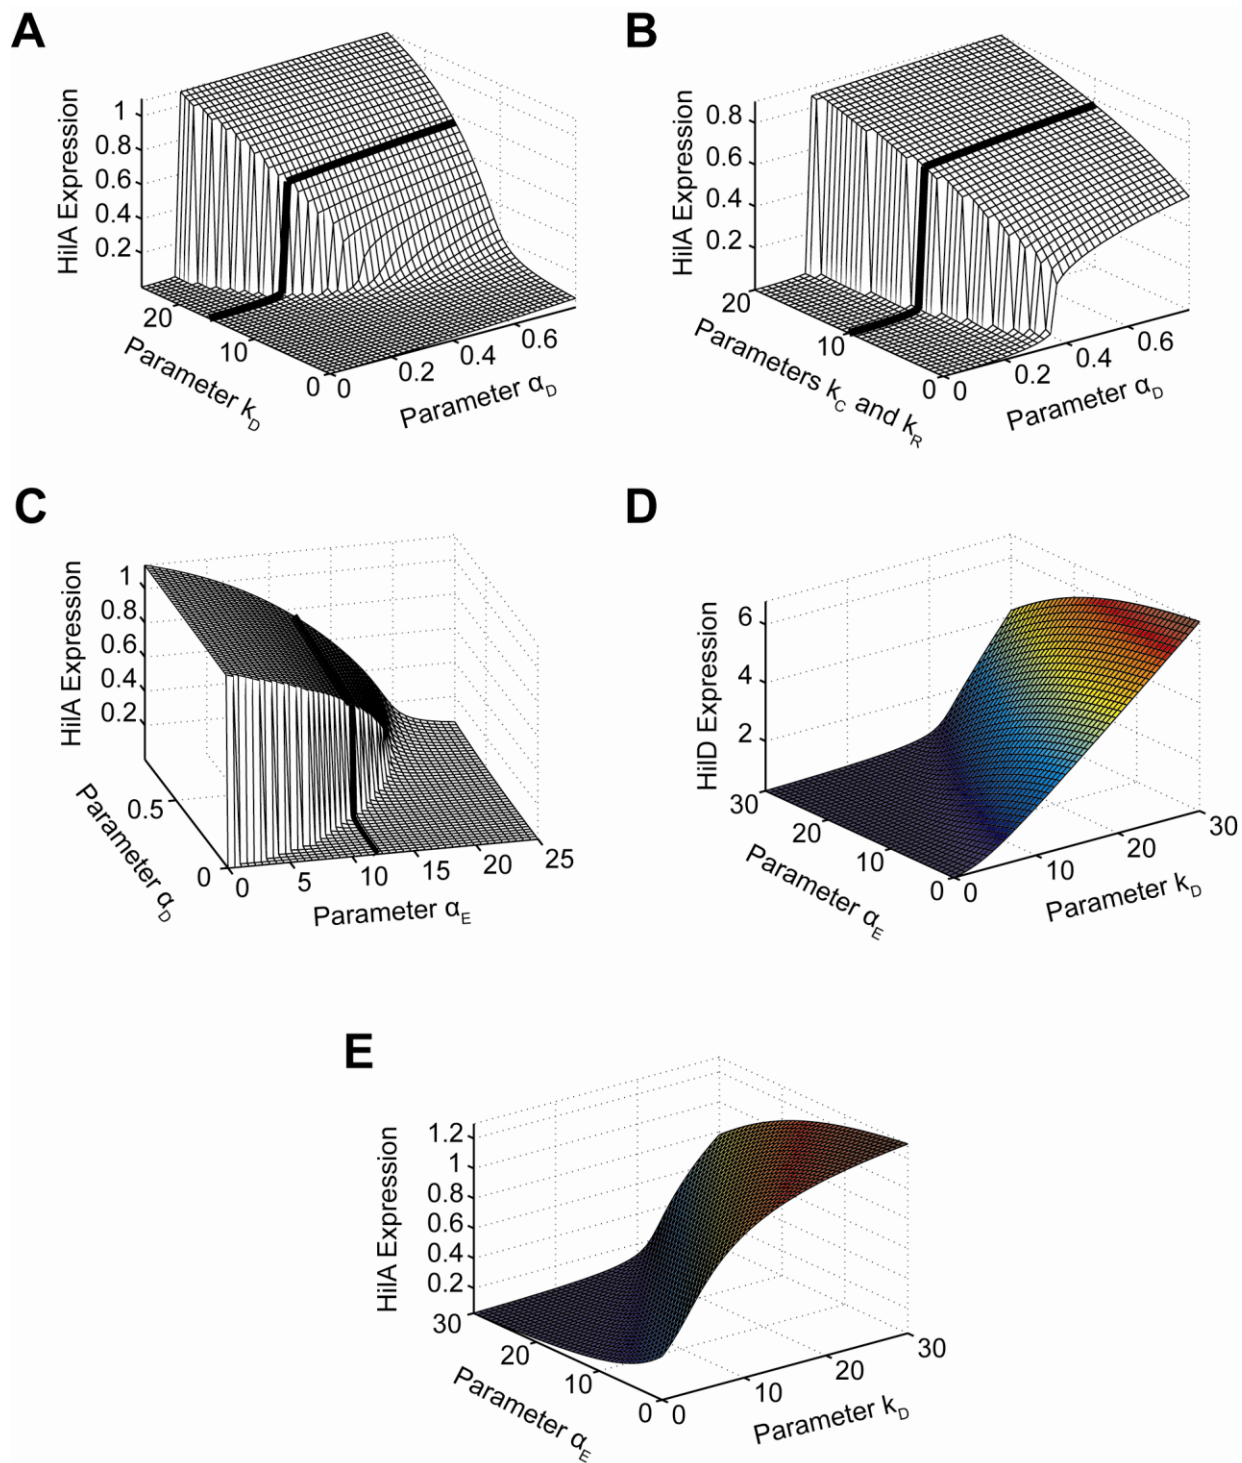

**Figure S6. Parametric analysis of model predicts that SPI1 gene circuit functions as an amplifier and encodes a hard activation threshold.**

(A) Effect of HilD positive feedback on HilA expression. Plot shows steady-state concentration of HilD as a function of the parameters  $k_D$  and  $\alpha_D$ . The parameter  $k_D$

specifies the degree by which the SPI1 regulators - HilC, HilD, and RtsA - can activate HilD expression, effectively the strength of positive feedback on HilD expression. The parameter  $\alpha_D$  specifies the strength of the signal activating HilD expression. (B) Effect of HilC and RtsA on HilA expression. Plot shows the steady-state concentration of HilD as a function of the parameters  $k_C$ ,  $k_R$ , and  $\alpha_D$ . The parameters  $k_C$  and  $k_R$  specify the degree by which the SPI1 regulators - HilC, HilD, and RtsA - can activate HilC and RtsA expression, respectively. In other words, these parameters set the strength of feedback on HilC and RtsA expression. In these simulations, the parameters  $k_C$  and  $k_R$  were both varied in tandem: the numerical values for the two are the same. (C) Effect of HilE on HilA expression. Plot shows the steady-state concentration of HilD as a function of the parameters  $\alpha_E$  and  $\alpha_D$ . (D-E) Effect of HilE and HilD positive feedback on HilD (D) and HilA (E) expression. Plots shows the steady-state concentrations of HilD and HilA as a function of the parameters  $\alpha_E$  and  $k_D$ . The black lines in the plots (A-C) are used to denote the results obtained using the nominal parameters (aside from  $\alpha_E$ ). A detailed description of the model is provided in the Materials and Methods.
